# Supplementary material
Source: Royal Society of Chemistry journal article supplement (doi:10.1039/d6tb00654j)
Supplement: d6tb00654j1.pdf [file d6tb00654j1.pdf]

## Supporting Materials

Chitosan with Defined Intrinsic Viscosity Enables Physicochemical Entrapment of Microplastics under *In Vitro* Gastric Conditions

Claudio Casella<sup>1\*</sup>, Santiago Ballaz<sup>2</sup>, Rafael Luque<sup>3,4</sup> and Umberto Cornelli<sup>5</sup>

<sup>1</sup>Department of Chemistry, University of Pavia, Viale Taramelli 12, 27100, Pavia, Lombardy, Italy; [claudio.casella01@universitadipavia.it](mailto:claudio.casella01@universitadipavia.it)

<sup>2</sup>Materials and Processes Research Group. Distance University of Madrid (UDIMA), Carretera de La Coruña, KM. 38,500 - Vía de Servicio, nº 15, CP 28400, Collado Villalba, Madrid, Spain; [sballazg@gmail.com](mailto:sballazg@gmail.com)

<sup>3</sup>Universidad ECOTEC, Km 13.5 Samborondón, Samborondón EC092302, Ecuador; [rluque@ecotec.edu.ec](mailto:rluque@ecotec.edu.ec)

<sup>4</sup>National University of Science and Technology POLITEHNICA Bucharest, 1-7 Gh. Polizy str., Bucharest, Romania

<sup>5</sup>Department of Molecular Pharmacology and Therapeutics, School of Medicine, Loyola University, Chicago, IL 60660, (USA); [ucornelli@gmail.com](mailto:ucornelli@gmail.com)

\*Corresponding author: [claudio.casella01@universitadipavia.it](mailto:claudio.casella01@universitadipavia.it)

**Table S1.** Decision matrix: chitosan networks for MP capture\*

| MP Size                                   | Environment                                    | pH ionic / strength                                   | Shear conditions      | Optimal chitosan viscosity            | Observations                                                                 |
|-------------------------------------------|------------------------------------------------|-------------------------------------------------------|-----------------------|---------------------------------------|------------------------------------------------------------------------------|
| 100 - 500 $\mu\text{m}$ (mixed fragments) | Dynamic flow (intestinal lumen, stirred water) | Moderately acidic (pH 4-6), low-medium ionic strength | Moderate shear        | 90 - 120 cP                           | Finer mesh increases interception; starch/lipid domains enhance adhesion     |
|                                           | Dynamic flow or semi-static                    | Acidic to neutral (pH 5-7), medium ionic strength     | Moderate - high shear | 90 - 120 cP with starch reinforcement | Balanced capture: co-formulation prevents flocculation                       |
| > 500 $\mu\text{m}$ (macro-fragments)     | Static filtration (membrane, gels)             | Neutral (pH 6-7), medium-high ionic strength          | Low shear             | 250 - 450 cP with lipid domains       | Robust network resists deformation; suitable for fibrous/membrane structures |
| Mixed particle                            | Pulsatile or turbulent flow                    | Acidic (pH 4-6), variable ionic strength              | High shear            | 90 - 120 cP with lipid domains        | Hydrophobic adhesion, fine mesh maximizes capture efficiency                 |
| Highly oxidized/charged plastics          | Aqueous, suspension                            | Acidic (pH 4-5), low ionic strength                   | Moderate shear        | 90 - 120 cP, DDA $\geq$ 85-90%        | Protonated chitosan maximizes electrostatic binding                          |

\*Viscosity values are determined by the molecular weight and concentration of the chitosan polymer, where higher viscosity (250–450 cP) provides the structural integrity needed for static filtration, while lower viscosity (90–120 cP) allows for the creation of finer, more adaptive meshes in dynamic or high-shear conditions.

- 90–120 cP chitosan: Ideal for mixed particle sizes, dynamic settings, and tiny mesh. easier to co-gel with lipids and starches.
- 250–450 cP chitosan: Optimal for robust, stationary structures aimed at larger fragments. Provides mechanical strength, although it is less effective for small particles.
- Composite design: Lipids produce hydrophobic domains that "wet" polymers, improving adhesion; starches control porosity and viscosity.
- pH control: Strong electrostatic attraction to oxidized or negatively charged microplastics is ensured by protonated chitosan (acidic conditions).

#### Functional Contributions of Co-Formulants and pH Sensitivity:

- Lipids ("Wet" Effect): Create hydrophobic domains that "wet" MP surfaces, improving adhesion.
- Starches (Porosity Control): Scaffold the network, maintain viscosity, and regulate mesh size for stable entrapment.
- pH Sensitivity: At acidic pH (1.5–3.5), chitosan amines protonate ( $-\text{NH}_3^+$ ), enhancing electrostatic attraction to negatively charged or oxidized MPs

**Figure S1.** Spatial distribution of polymer networks (*derived from Table 3*)

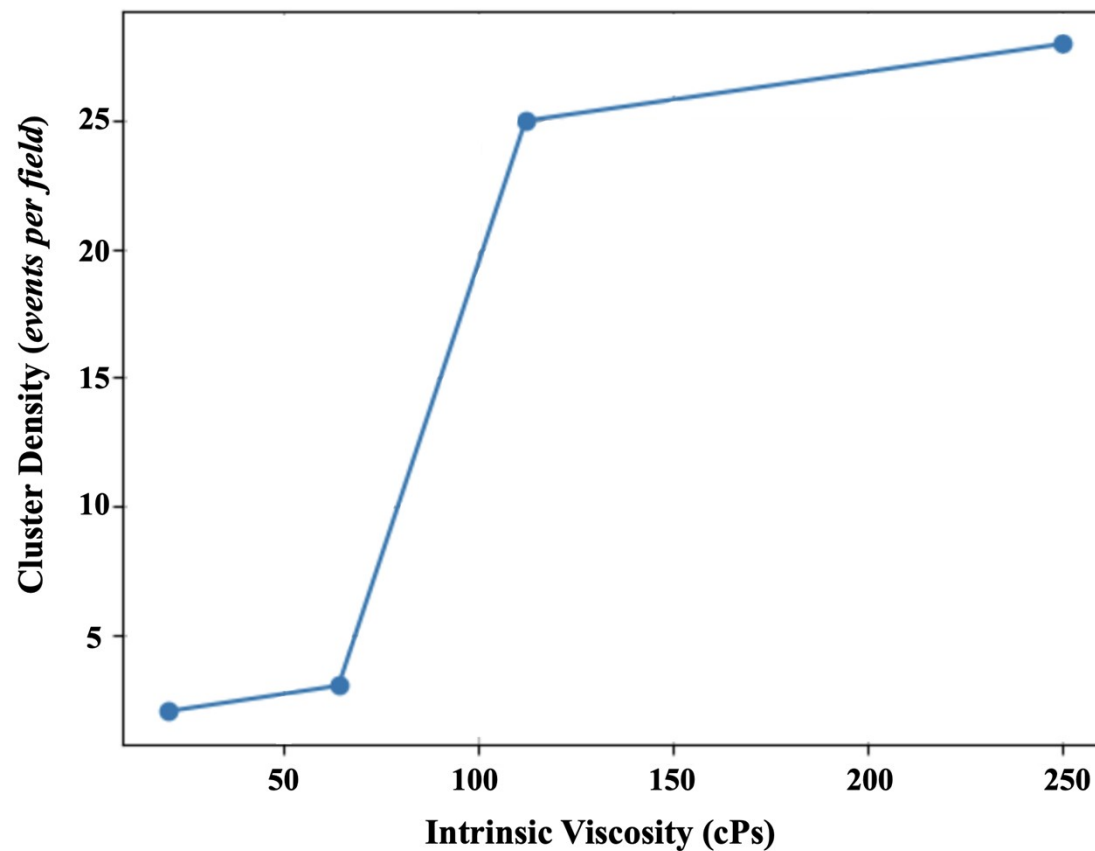

SEM scoring provided a semi-quantitative representation of the spatial distribution of polymer networks (Table 3). In order to represent structural trends, the categorical interaction scores were transformed into approximate cluster density values (events per field). A threshold-like shift from dispersed polymer-particle interactions to a more linked network structure is confirmed by the resulting plot, which exhibits a sharp increase in cluster density above  $\sim 90$  cPs.
